# Supplementary material for: Comparison of two online extraction systems and development of the online SPE-HPLC-DAD method to simultaneously determine ten β-amino alcohol drugs in plasma
Source: Royal Society of Chemistry journal article supplement (doi:10.1039/c7ra13276j), 2018-01-01
Supplement: c7ra13276j1.pdf [file c7ra13276j1.pdf]

## Comparison of two online extraction systems and development of the online SPE-HPLC-DAD method to simultaneously determine ten $\beta$ -amino alcohol drugs in plasma

Man Wang<sup>a,b</sup>, Lei Liu<sup>a</sup>, Zheng Yin<sup>a,b</sup>, Yaxin Lu<sup>a,b,\*</sup>

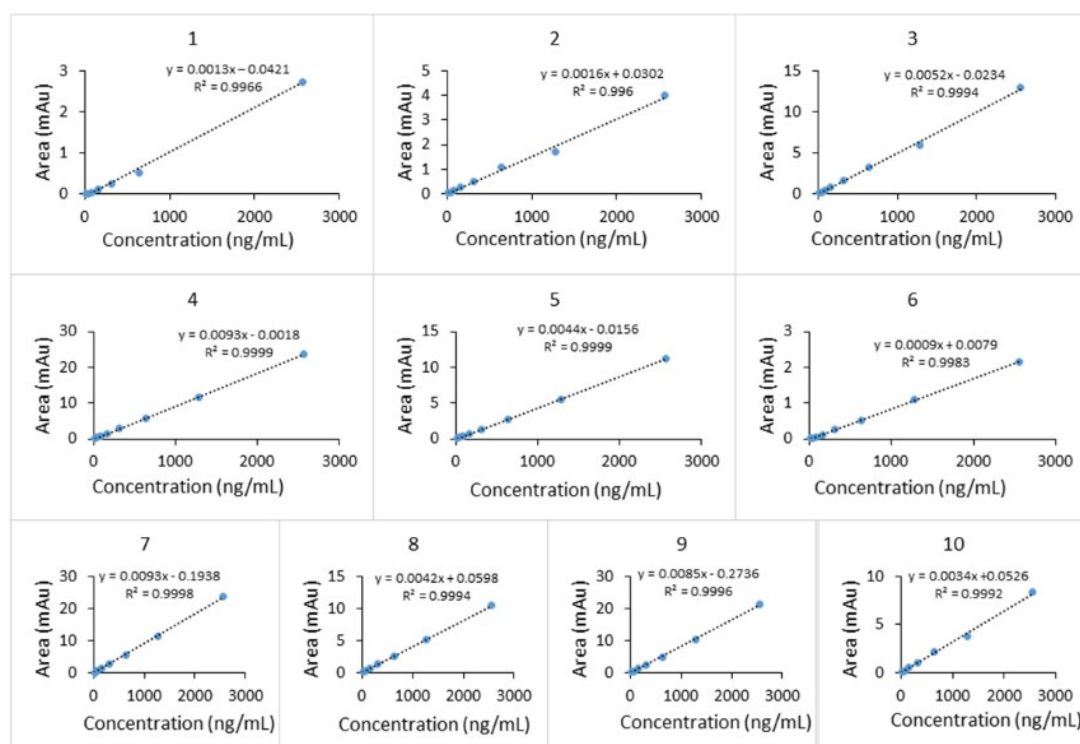

Fig.S1. The linearity and plot of concentration and peak area for each analyte

Table S1 the mobilephase condition of online SPE-HPLC system

| Time<br>(min) | Pump right            |           |         | Pump left             |                                                        |     | Valve<br>position |
|---------------|-----------------------|-----------|---------|-----------------------|--------------------------------------------------------|-----|-------------------|
|               | Flow rate<br>(mL/min) | Water (%) | ACN (%) | Flow rate<br>(mL/min) | 5 mM<br>NaH <sub>2</sub> PO <sub>4</sub><br>buffer (%) | ACN |                   |
| 0             | 1                     | 100       | 0       | 1                     | 98                                                     | 2   | A                 |
| 2             | 1                     | 100       | 0       | 1                     | 98                                                     | 2   | B                 |
| 3             | 0.2                   | 100       | 0       | 1                     | 98                                                     | 2   | B                 |
| 4             | 0.2                   | 100       | 0       | 1                     | 98                                                     | 2   | B                 |
| 10            | 0.2                   | 80        | 20      | 1                     | ↓                                                      | ↓   | A                 |
| 20            | 0.2                   | 100       | 0       | 1                     | 44                                                     | 56  | A                 |
| 21            | 1                     | 100       | 0       | 1                     | 98                                                     | 2   | A                 |
| 27            | 1                     | 100       | 0       | 1                     | 98                                                     | 2   | A                 |

Table S2 the mobilephase condition of online TFC-HPLC system

| Time<br>(min) | Pump right            |           |         | Pump left             |                                                |     | Valve<br>position |
|---------------|-----------------------|-----------|---------|-----------------------|------------------------------------------------|-----|-------------------|
|               | Flow rate<br>(mL/min) | Water (%) | ACN (%) | Flow rate<br>(mL/min) | 5 mM                                           | ACN |                   |
|               |                       |           |         |                       | NaH <sub>2</sub> PO <sub>4</sub><br>buffer (%) |     |                   |
| 0             | 3                     | 98        | 2       | 1                     | 98                                             | 2   | A                 |
| 1             | 3                     | 98        | 2       | 1                     | 98                                             | 2   | B                 |
| 3             | 1                     | 98        | 2       | 1                     | 98                                             | 2   | B                 |
| 4             | 0.2                   | ↓         | ↓       | 1                     | 98                                             | 2   | B                 |
| 10            | 0.2                   | 10        | 90      | 1                     | ↓                                              | ↓   | B                 |
| 18            | 0.2                   | ↓         | ↓       | 1                     |                                                |     | A                 |
| 20            | 1                     | 98        | 2       | 1                     | 44                                             | 56  | A                 |
| 21            | 3                     | 98        | 2       | 1                     | 98                                             | 2   | A                 |
| 25            | 3                     | 98        | 2       | 1                     | 98                                             | 2   | A                 |

Table S3 The recovery of each compound

| No | Retention time<br>(min) | Analyte                    | Extraction recovery |       |      |         |
|----|-------------------------|----------------------------|---------------------|-------|------|---------|
|    |                         |                            | Conc.(ng/mL)        | Mean  | SD   | RSD (%) |
| 1  | 5.14                    | Adrenalin                  | 40                  | 94.29 | 3.86 | 4.09    |
|    |                         |                            | 160                 | 95.72 | 5.02 | 5.24    |
|    |                         |                            | 1280                | 95.38 | 4.85 | 5.08    |
| 2  | 9.61                    | Salbutamol                 | 40                  | 94.33 | 3.92 | 4.16    |
|    |                         |                            | 160                 | 97.69 | 5.26 | 5.38    |
|    |                         |                            | 1280                | 97.58 | 5.26 | 5.39    |
| 3  | 10.49                   | Ephedrine                  | 40                  | 96.45 | 4.01 | 4.16    |
|    |                         |                            | 160                 | 93.99 | 5.39 | 5.73    |
|    |                         |                            | 1280                | 98.77 | 4.29 | 4.34    |
| 4  | 11.58                   | Carteolol                  | 40                  | 98.51 | 3.38 | 3.43    |
|    |                         |                            | 160                 | 93.43 | 4.11 | 4.40    |
|    |                         |                            | 1280                | 94.78 | 4.36 | 4.60    |
| 5  | 12.58                   | Clorprenaline              | 40                  | 95.51 | 4.81 | 5.04    |
|    |                         |                            | 160                 | 96.18 | 5.04 | 5.24    |
|    |                         |                            | 1280                | 93.08 | 4.36 | 4.68    |
| 6  | 12.97                   | Timolol<br>hydrogenmaleate | 40                  | 94.58 | 4.28 | 4.53    |
|    |                         |                            | 160                 | 93.74 | 4.68 | 4.99    |
|    |                         |                            | 1280                | 92.38 | 4.62 | 5.00    |
| 7  | 13.53                   | Clenbuterol                | 40                  | 94.38 | 4.64 | 4.92    |
|    |                         |                            | 160                 | 95.79 | 4.74 | 4.95    |
|    |                         |                            | 1280                | 97.45 | 4.82 | 4.95    |
| 8  | 13.82                   | Mexiletine                 | 40                  | 98.53 | 5.70 | 5.79    |
|    |                         |                            | 160                 | 96.24 | 4.98 | 5.17    |
|    |                         |                            | 1280                | 95.65 | 4.23 | 4.42    |
| 9  | 15.55                   | Propranolol                | 40                  | 93.22 | 4.66 | 5.00    |
|    |                         |                            | 160                 | 94.55 | 4.03 | 4.26    |
|    |                         |                            | 1280                | 96.04 | 4.38 | 4.56    |
| 10 | 17.36                   | Carvedilol                 | 40                  | 93.87 | 4.46 | 4.75    |
|    |                         |                            | 160                 | 94.56 | 4.35 | 4.60    |
|    |                         |                            | 1280                | 94.77 | 4.27 | 4.51    |
